# Supplementary material for: Surfactant-derived water-soluble carbon dots for quantitative determination of fluoride via a turn-off–on strategy
Source: Royal Society of Chemistry journal article supplement (doi:10.1039/d1nj04838d), 2021-11-25
Supplement: d1nj04838d1.pdf [file d1nj04838d1.pdf]

## Supplementary Information

### Surfactant derived water-soluble carbon dots for quantitative determination of fluoride via turn-off-on strategy

Shagun Kainth, Neha Goel, Soumen Basu\* and Banibrata Maity\*

\*School of Chemistry and Biochemistry, Affiliate Faculty—TIET-Virginia Tech Center of Excellence  
in Emerging Materials, Thapar Institute of Engineering and Technology, Patiala-147004, India

Corresponding Author E-mail: [banibrata.maity@thapar.edu](mailto:banibrata.maity@thapar.edu) (B. Maity);

[soumen.basu@thapar.edu](mailto:soumen.basu@thapar.edu) (S. Basu)

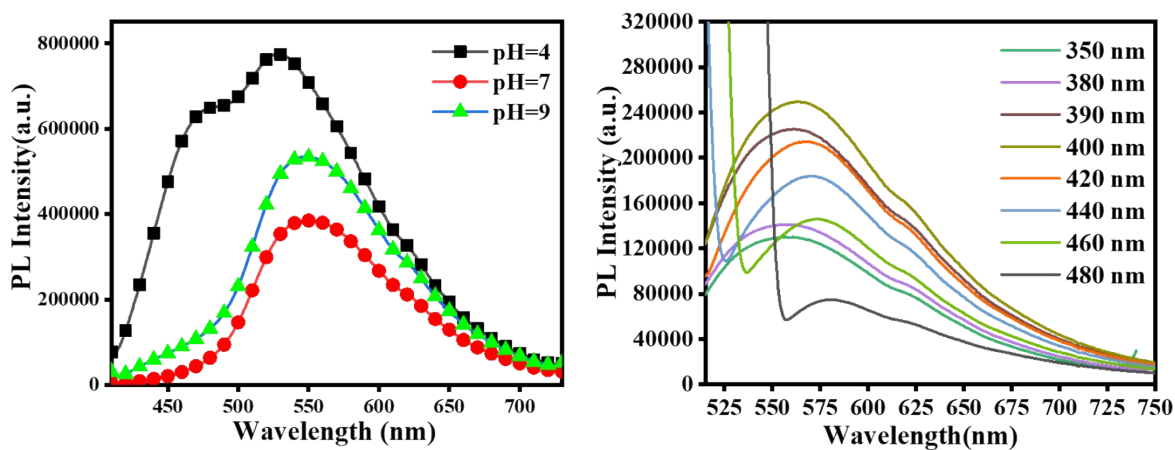

Fig. S1 a) Impact of pH, and b) different excitation wavelength on the PL response of WCDs.

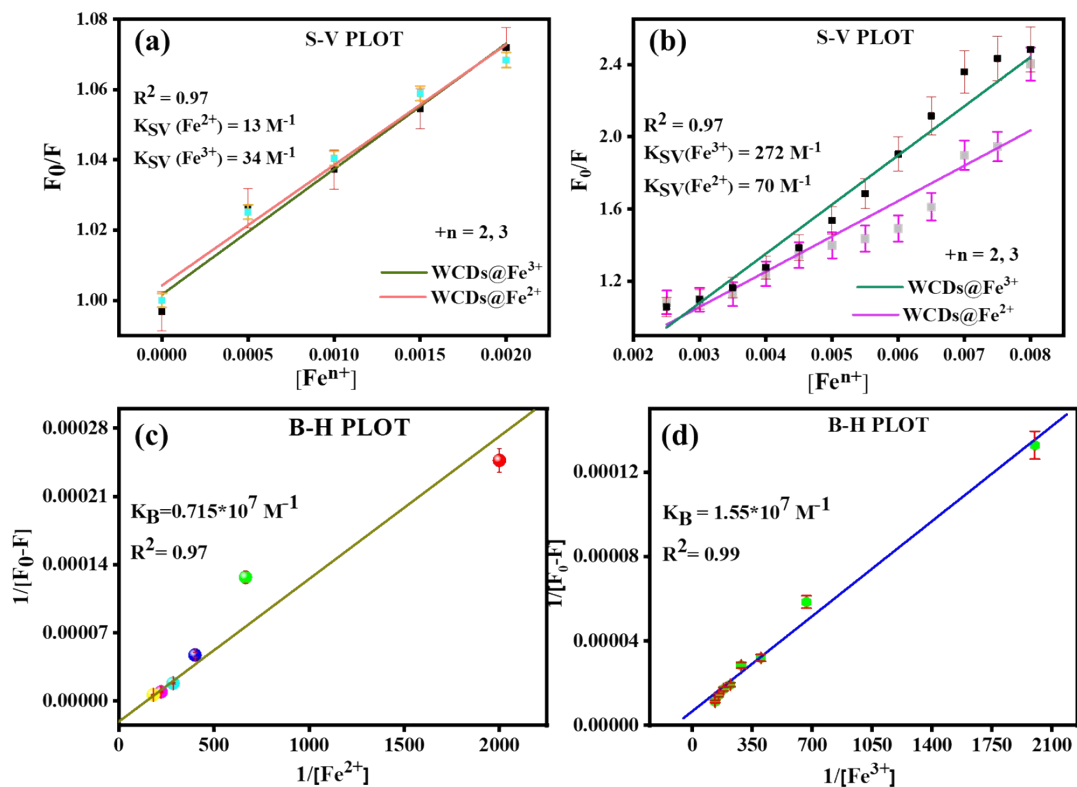

**Fig. S2** Determination of quenching and binding constant of WCDs by using (a, b) S-V plot and (c, d) B-H plot for Fe<sup>2+</sup>, Fe<sup>3+</sup> ions.

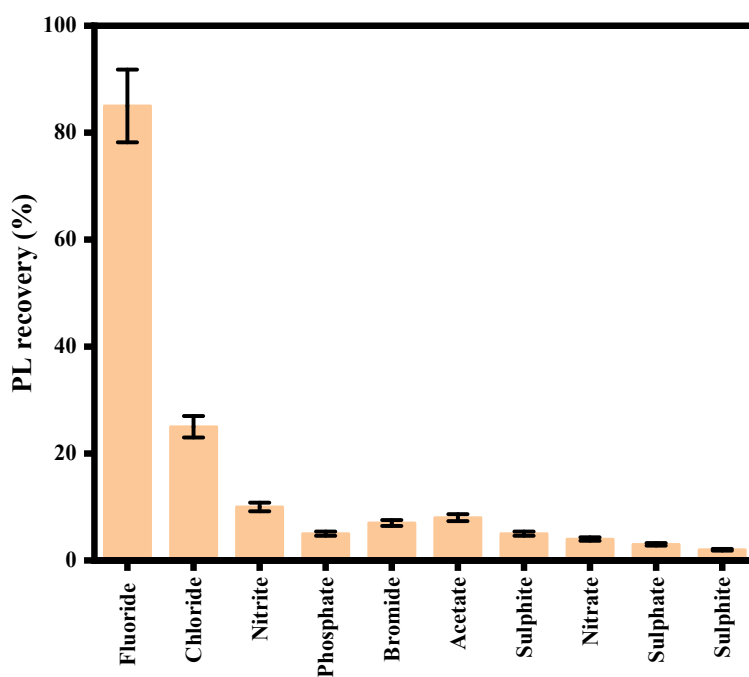

**Fig. S3** PL recovery response of WCDs@Fe<sup>3+</sup> in the presence of different anions.
